## **Cep57 and Cep5711 cooperate to recruit the Cep63-Cep152 complex for centriole biogenesis**

Huijie Zhao<sup>1</sup>, Sen Yang<sup>1</sup>, Xiaomeng Duan<sup>1</sup>, Qingxia Chen<sup>2</sup>, Guoqing Li<sup>1</sup>, Qiongping Huang<sup>1</sup>,  
Xueliang Zhu<sup>1,2,\*</sup> and Xiumin Yan<sup>1,\*</sup>

<sup>1</sup> State Key Laboratory of Cell Biology, CAS Center for Excellence in Molecular Cell Science, Shanghai Institute of Biochemistry and Cell Biology, Chinese Academy of Sciences; University of Chinese Academy of Sciences, 320 Yueyang Road, Shanghai 200031, China

<sup>2</sup> School of Life Science and Technology, ShanghaiTech University, 100 Haike Road, Shanghai 201210, China

\* To whom correspondence should be addressed

Mailing address: Institute of Biochemistry and Cell Biology, 320 Yue Yang Road,  
Shanghai 200031, China

Fax: 86-21-54921011

Tel: 86-21-54921406

E-mail: [xlzhu@sibcb.ac.cn](mailto:xlzhu@sibcb.ac.cn) or [yanx@sibcb.ac.cn](mailto:yanx@sibcb.ac.cn)

**Running title:** The Initiation of Centriologogenesis

**Key Words:** centriole/centriole duplication/Cep57/Cep5711/Cep63/Cep152.

## **Summary statement**

Cep57 and its paralog, Cep5711, cooperatively act as a molecular scaffold to recruit the Cep63-Cep152 cradle to the proximal end of centrioles in the early stages of centriole duplication.

## Abstract

Cep152 and Cep63 act as the cradle and recruit Plk4 to initiate the centriole biogenesis in a mother centriole dependent manner. However, how the Cep152-Cep63 complex is targeted to the proximal end of mother centrioles is unclear. In this study, we show that Cep57 and its paralog, Cep57l1, colocalize with Cep63 and Cep152 at the proximal end of mother centrioles in both cycling cells and differentiated multiciliated cells. Both Cep57 and Cep57l1 associate with the Cep152-Cep63 complex by directly binding to the centrosomal targeting region of Cep63. Co-depletion of Cep57 and Cep57l1 blocks the loading of Cep63-Cep152 to the centriole and subsequently prevents centriole duplication. We propose that Cep57 and Cep57l1 act together to ensure the recruitment of the Cep63-Cep152 complex to the mother centrioles for procentriole formation.

## Introduction

In mammalian cells, centrosomes function as spindle poles in mitosis and basal bodies for cilia formation. Typically, a centrosome is made of two cylindrical centrioles surrounded with pericentriolar material (PCM) (Nigg and Raff, 2009). In dividing animal cells, the duplication of centrioles must be tightly controlled to ensure the correct bipolar spindle formation, which is important for the integrity of genome. Aberration in centriole duplication is commonly present in numerous tumors and other diseases (Bettencourt-Dias et al., 2011; Gonczy, 2015; Nigg and Holland, 2018). Recent years, great progress has been made to understand the molecular mechanism of centriole biogenesis. To initiate the centriole duplication in mammals, Plk4 is firstly recruited by the Cep192-containing ring around the proximal mother centrioles at the early G1 phase and subsequently translocated to the larger Cep152-containing ring when Cep152 is recruited to the mother centriole (Kim et al., 2013; Sonnen et al., 2013). At the Cep152-ring, Plk4 recruits and phosphorylates Stil/Sas-5 to load Sas-6 for the cartwheel formation (Arquint et al., 2015; Arquint et al., 2012; Cizmecioglu et al., 2010; Dzhindzhev et al., 2010; Moyer et al., 2015; Ohta et al., 2014; Ohta et al., 2018). Several proteins, including Cep135, Cpap, Cp110 and Cep120, contribute to build the centriolar MT wall and mediate centriole elongation (Azimzadeh and Marshall, 2010; Brito et al., 2012; Carvalho-Santos et al., 2012; Comartin et al., 2013; Hung et al., 2004; Kohlmaier et al., 2009; Loncarek and Bettencourt-Dias, 2018; Schmidt et al., 2009). It is known that Cep152 is recruited by Cep63 to act as the cradle for the mother centriole dependent (MCD) centriole biogenesis (Brown et al., 2013; Kim et al., 2019; Sir et al., 2011; Zhao et al., 2013). However, it is still unclear how Cep63 or the Cep63-Cep152 complex is targeted at the proximal end of mother centrioles.

Cep57, a FGF-2 binding and trafficking protein, has been reported to be required for normal centriole duplication, proper chromosome segregation, PCM organization and centriole engagement (Bossard et al., 2003; Cuevas et al., 2013; Meunier et al., 2009; Snape et al., 2011; Wu et al., 2012; Zhou et al., 2016). Cep57, Cep63 and Cep152 form a stable complex at the proximal end of the centrioles and Cep57 is the proximity interactor of Cep63 (Firat-Karalar et al., 2014; Fortun et al., 2018; Lukinavicius et al., 2013; Sieben et al., 2018), suggesting that Cep57 may act as the upstream protein to target the Cep63-Cep152 complex for centriole duplication.

In this study, we find that Cep57l1 is the paralog of Cep57 and these two proteins recruit the Cep63-Cep152 complex for the centriole duplication.

## Results and Discussion

### **Cep57 specifically co-localizes with Cep63 and Cep152 at the proximal end of mother centrioles**

To investigate the spatial relationship of Cep57, Cep63 and Cep152, we costained Cep57 with either Cep63 or Cep152 in U2OS cells. Consistent with the previous study(Lukinavicius et al., 2013), 3D-structured illumination microscopy (3D-SIM) results showed that Cep57 formed a ring-like structure with Cep63 and Cep152 at the proximal end of both centrioles (Fig. 1A). Cep57 colocalized with Cep63 with a similar diameter ( $426.7 \pm 49.7$  nm for Cep57,  $441.0 \pm 39.6$  nm for Cep63; 26 centrioles from 13 cells), while Cep152 stained a slightly bigger ring ( $511.0 \pm 36.2$  nm, 26 centrioles from 13 cells) (Fig. 1A,B). Consistently, GFP-Cep57 also enriched at the base of mother centrioles in U2OS cells. In addition to the centriolar localization, overexpression of GFP-Cep57 resulted in microtubule (MT) bundling and both Cep63 and Cep152 were recruited to the bundled MTs (Lin et al., 2013b; Momotani et al., 2008; Zhou et al., 2016) (Fig. 1C,D), indicating that Cep57, Cep63 and Cep152 form a complex and Cep57 could recruit Cep63 and Cep152 *in vivo*.

During multiciliation, mouse tracheal epithelial cells (mTECs) assemble hundreds of centrioles through both mother centriole-dependent (MCD) and deuterosome-dependent (DD) pathways respectively driven by Cep63 and its paralog, Deup1 (Lin et al., 2013a; Zhao et al., 2019; Zhao et al., 2013). At the early stages of centriole amplification, Cep63 specifically localizes at the proximal end of parental centrioles, but not at the deuterosomes, with the association of Cep152. Interestingly, Cep57 behaved similarly as Cep63 during mTECs differentiation (Fig. 1E,G). In stage I, Cep57 colocalized with Cep152 at the proximal end of two parental centrioles. In stages II and III, Cep57 exclusively associated with the parental centrioles,

but not with the deuterosomes. In stage IV, Cep57 started to occupy the base of each procentriole formed around the parental centrioles and deuterosomes, where Cep152 started to protrude spoke-like structures. In stages V and VI, Cep57 still located at the proximal end of each nascent centriole as a full ring structure whereas Cep152 and Cep63 further converted into a dot (Fig. 1E) (Zhao et al., 2013). Consistent with the localization of endogenous Cep57, GFP-Cep57 exhibited a similar localization pattern in mTECs (Fig. 1F,G).

The spatiotemporal distribution of Cep57 in mTECs indicates that Cep57, similar as Cep63, only contributes to the MCD pathway and Cep57 together with Cep63 could recruit Cep152 for the MCD centriole assembly.

### **Cep57, Cep63 and Cep152 interact hierarchically**

To explore the relationship among Cep57, Cep63 and Cep152, we performed co-immunoprecipitation and GST pull-down experiments (Figs. 2, S1). Cep57 localized to the centriole via its C-terminal MT binding domain (Momotani et al., 2008) and interacted with Cep63 through its N-terminal coiled-coil domain (Figs. 2A and S1A,B). Cep63 bound to Cep57 via its N-terminal centriole-binding region and its C-terminus interacted with the centrosomal targeting region of Cep152 (152M) (Figs. 2B and S1C,D)(Hatch et al., 2010; Zhao et al., 2013). In the GST-pull down assay, GST-Cep57 directly interacted with His-Cep63, but could not pull down Cep152M in the absence of Cep63 (Fig. 2C), indicating that Cep57 forms the complex with Cep152 through Cep63 and these three proteins interact in a hierarchical manner (Fig. 2D). These results indicate that Cep57 localizes to the proximal mother centriole through its C-terminus and recruits the Cep63-Cep152 cradle by directly binding to the centriolar targeting region of Cep63.

### **Depletion of Cep57 does not affect the centriolar localization of Cep63 and Cep152**

To test whether Cep57 is required for the centrosomal targeting of Cep63 and Cep152, we generated *Cep57* and *Cep63* knockout (KO) U2OS cell lines using the CRISPR/Cas9 method (Fig. S2)(Cong et al., 2013). Immunofluorescence analysis of *Cep63* KO or *Cep57* KO cell lines revealed a complete loss of Cep63 or Cep57 ring-like signals at the proximal end of centrioles (Fig. 2E-H). As reported previously (Lukinavicius et al., 2013; Sir et al., 2011), Cep152 centrosomal signal reduced dramatically in *Cep63* KO cells compared to that in control cells (Fig. 2E). The centrosomal localization of Cep57 was not affected in *Cep63* KO cells (Fig. 2F). Surprisingly, both Cep63 and Cep152 were still able to localize at the centrosome in *Cep57* KO cells (Fig. 2G,H). These results are in accordance with the previous findings that Cep63 is essential for Cep152 centrosomal localization, whereas Cep57 seems to be dispensable for loading the Cep63-Cep152 cradle to the centrosome (Lukinavicius et al., 2013; Sir et al., 2011).

The dispensable role of Cep57 in the centriolar targeting of the Cep63-Cep152 complex is contradictory to the fact that Cep57 forms a stable complex with Cep63 and Cep152 by directly binding to the centriolar targeting region of Cep63. The paradox raises a possibility that other proteins may function redundantly with Cep57 to recruit Cep63 and Cep152.

### **Cep5711, the paralog of Cep57, forms a complex with Cep63 and Cep152 at the proximal end of mother centrioles**

We searched for the homologous protein of Cep57 by protein BLAST and we indeed found out Cep5711, the Cep57 paralog. Cep5711 had similar function domains and shared approximately 43% identities with Cep57 (Figs. 3A and S3). We first tested whether Cep5711 also interacts with Cep63 as Cep57. We found that the N-terminus of Cep5711 was necessary and sufficient to bind Cep63 (Fig. 3B,C). Cep63 also interacted with Cep5711 through its N-terminal centrosomal targeting fragment (Fig. 3E,F).



Due to the lack of the Cep5711 antibody, we examined the subcellular localization of Cep5711 by expressing GFP-Cep5711 in U2OS cells. GFP-Cep5711 also formed a ring-like structure with Cep63 and Cep152 at the proximal end of centrioles in the interphase with a comparable diameter to Cep57 ( $426.6 \pm 34.2$  nm, 40 centrioles from 24 cells) (Figs. 3H). Interestingly, although Cep5711 showed high similarity with Cep57, Cep5711 could not bundle microtubules (Fig. 3D,H). In addition, Cep5711 was targeted to the centrioles through its N-terminal region (Fig. 3B,D), which was also different from Cep57 (Figs. 2A, S1A).

In multiciliated mTECs, GFP-Cep5711 displayed similar subcellular distribution as Cep57 and Cep63 (Figs. 3I) (Lin et al., 2013a; Zhao et al., 2013). It also specifically associated with the parental centrioles but not with deuterosomes at the early stages of centriole amplification in mTECs (stages II and III). In stage IV, GFP-Cep5711 started to accumulate at the base of nascent centrioles to form a goblet like structure (Fig. 3I). Like Cep57, GFP-Cep5711 still localized at the proximal end of centrioles in a ring-like pattern in stages V and VI (Fig. 3I). Collectively, these findings imply that Cep5711 is the paralog of Cep57 and like Cep57, Cep5711 interacts with Cep63 at the proximal end of centrioles.

### **Cep57 and its paralog Cep5711 cooperate to recruit the Cep63-Cep152 complex for centriole duplication**

To examine whether Cep5711 is required for the localization of Cep63 and Cep152, we depleted Cep5711 by RNAi in both wild type and *Cep57* KO U2OS cells (Fig. 4). Given the lack of Cep5711 antibody, we selected Cep5711 siRNA oligos by co-expression of GFP-Cep5711 with various siRNA oligos and two oligos, 57L1i-1 and 57L1i-2, were chosen based on knockdown efficiency (Fig. S4).

As expected, like Cep57, depletion of Cep5711 alone did not affect the centriolar localization of either Cep63 or Cep152 in control U2OS cells (Fig. 4A). In contrast, depletion of Cep5711 in *Cep57* KO cells completely abolished the centriolar localization of Cep63 and Cep152 (Fig. 4B), suggesting that Cep57 and Cep5711 act together to ensure the localization of the Cep63-Cep152 complex. Furthermore, the localization of Cep63 and Cep152 could be rescued by expressing either GFP-Cep57 or siRNA-resistant GFP-*hCep5711* (GFP-*hCep5711R*), but not GFP-Centrin1(GFP-Cetn1) (Fig. 4C).

To investigate whether procentriole assembly is impaired by co-depletion of both Cep57 and Cep5711, we counted the number of assembled procentrioles marked by Sas-6 in S-phase cells. Consistent with the function of Cep63 and Cep152, the procentriole assembly was severely impaired upon the co-depletion of both Cep57 and Cep5711 (Fig. 4D,E), demonstrating a critical function of Cep57 and Cep5711 in the initiation of centriole duplication.

In this study, we find that Cep57 and its paralog Cep5711 form a complex and colocalize with the Cep63-Cep152 cradle at the proximal end of mother centrioles. In multiciliated cells, similar as Cep63, Cep57 and Cep5711 only associate with the parental centrioles but not with the deuterosomes at the early stages of centriole amplification, suggesting that Cep57, Cep5711 together with Cep63 specifically function in the MCD pathway for recruiting Cep152. Co-depletion of Cep57 and Cep5711 disrupts the localization of the Cep63-Cep152 complex at the mother centriole, sequentially blocks normal procentriole formation. Our results indicate that Cep57 and Cep5711 cooperate to recruit the Cep63-Cep152 complex at the proximal end of mother centrioles for centriole biogenesis.

Recently, Cep295 is identified as the key protein for the conversion of daughter centrioles into functional mother centrioles, and the loading of Cep152 by Cep135 and Cep295 to daughter centrioles is critical for the conversion (Fu et al., 2016; Tsuchiya et al., 2016). Interestingly, Cep295 is only required for targeting of Cep152 to the young mother centriole, but not to the old mother centriole, implying that other scaffold proteins might play a role in anchoring Cep152 to the old mother centriole. Our findings here raise a possibility that Cep63 recruited by Cep57/Cep5711 may function in detaining Cep152 at the mother centriole after its initial loading by Cep135-Cep295 during the centriole-to-centrosome conversion. In the future, it will be interesting to investigate the relationship among Cep57/Cep5711, Cep63 and Cep295 in the centriolar localization of Cep152.

## **Acknowledgements**

The authors thank the Centre for Biological Imaging, Institute of Biophysics, CAS, for supports on 3D-SIM imaging, and institutional core facilities for cell biology and molecular biology for instrumental and technical supports. This work was supported by National Key R&D Program of China (2017YFA0503500) and Chinese Academy of Sciences (XDB19020000).

## **Author contributions**

X.Y. and X.Z. conceived and directed the project; H.Z. performed major experiments; S.Y. carried out quantification and generated knockout cell lines with the help of G.L., X.D. performed the GST pull-down experiment, Q.C. verified the localization of truncated proteins, and Q.H. assisted with the generation of the homemade antibodies; X.Y., X.Z., and H.Z. designed experiments, interpreted data, and wrote the paper.

## **Additional information**

The authors declare no competing interest.

## References

- Arquint, C., Gabryjonczyk, A. M., Imseng, S., Bohm, R., Sauer, E., Hiller, S., Nigg, E. A. and Maier, T. (2015). STIL binding to Polo-box 3 of PLK4 regulates centriole duplication. *Elife* **4**.
- Arquint, C., Sonnen, K. F., Stierhof, Y. D. and Nigg, E. A. (2012). Cell-cycle-regulated expression of STIL controls centriole number in human cells. *J Cell Sci* **125**, 1342-52.
- Azimzadeh, J. and Marshall, W. F. (2010). Building the centriole. *Curr Biol* **20**, R816-25.
- Bettencourt-Dias, M., Hildebrandt, F., Pellman, D., Woods, G. and Godinho, S. A. (2011). Centrosomes and cilia in human disease. *Trends Genet* **27**, 307-15.
- Bossard, C., Laurell, H., Van den Berghe, L., Meunier, S., Zanibellato, C. and Prats, H. (2003). Translokine is an intracellular mediator of FGF-2 trafficking. *Nat Cell Biol* **5**, 433-9.
- Brito, D. A., Gouveia, S. M. and Bettencourt-Dias, M. (2012). Deconstructing the centriole: structure and number control. *Curr Opin Cell Biol* **24**, 4-13.
- Brown, N. J., Marjanovic, M., Luders, J., Stracker, T. H. and Costanzo, V. (2013). Cep63 and cep152 cooperate to ensure centriole duplication. *PLoS One* **8**, e69986.
- Carvalho-Santos, Z., Machado, P., Alvarez-Martins, I., Gouveia, S. M., Jana, S. C., Duarte, P., Amado, T., Branco, P., Freitas, M. C., Silva, S. T. et al. (2012). BLD10/CEP135 is a microtubule-associated protein that controls the formation of the flagellum central microtubule pair. *Dev Cell* **23**, 412-24.
- Cizmecioglu, O., Arnold, M., Bahtz, R., Settele, F., Ehret, L., Haselmann-Weiss, U., Antony, C. and Hoffmann, I. (2010). Cep152 acts as a scaffold for recruitment of Plk4 and CPAP to the centrosome. *J Cell Biol* **191**, 731-9.
- Comartin, D., Gupta, G. D., Fussner, E., Coyaud, E., Hasegan, M., Archinti, M., Cheung, S. W., Pinchev, D., Lawo, S., Raught, B. et al. (2013). CEP120 and SPICE1 cooperate with CPAP in centriole elongation. *Curr Biol* **23**, 1360-6.
- Cong, L., Ran, F. A., Cox, D., Lin, S., Barretto, R., Habib, N., Hsu, P. D., Wu, X., Jiang, W., Marraffini, L. A. et al. (2013). Multiplex genome engineering using CRISPR/Cas systems. *Science* **339**, 819-23.
- Cuevas, R., Korzeniewski, N., Tolstov, Y., Hohenfellner, M. and Duensing, S. (2013). FGF-2 disrupts mitotic stability in prostate cancer through the intracellular trafficking protein CEP57. *Cancer Res* **73**, 1400-10.
- Dzhindzhev, N. S., Yu, Q. D., Weiskopf, K., Tzolovsky, G., Cunha-Ferreira, I., Riparbelli, M., Rodrigues-Martins, A., Bettencourt-Dias, M., Callaini, G. and Glover, D. M. (2010). Asterless is a scaffold for the onset of centriole assembly. *Nature* **467**, 714-8.
- Firat-Karalar, E. N., Rauniyar, N., Yates, J. R., 3rd and Stearns, T. (2014). Proximity interactions among centrosome components identify regulators of centriole duplication. *Curr Biol* **24**, 664-70.
- Fortun, D., Guichard, P., Hamel, V., Sorzano, C. O. S., Banterle, N., Gonczy, P. and Unser, M. (2018). Reconstruction From Multiple Particles for 3D Isotropic Resolution in Fluorescence Microscopy. *IEEE Trans Med Imaging* **37**, 1235-1246.
- Fu, J., Lipinszki, Z., Rangone, H., Min, M., Mykura, C., Chao-Chu, J., Schneider, S., Dzhindzhev, N. S., Gottardo, M., Riparbelli, M. G. et al. (2016). Conserved molecular interactions in centriole-to-centrosome conversion. *Nat Cell Biol* **18**, 87-99.

**Gonczy, P.** (2015). Centrosomes and cancer: revisiting a long-standing relationship. *Nat Rev Cancer* **15**, 639-52.

**Hatch, E. M., Kulukian, A., Holland, A. J., Cleveland, D. W. and Stearns, T.** (2010). Cep152 interacts with Plk4 and is required for centriole duplication. *J Cell Biol* **191**, 721-9.

**Hung, L. Y., Chen, H. L., Chang, C. W., Li, B. R. and Tang, T. K.** (2004). Identification of a novel microtubule-destabilizing motif in CPAP that binds to tubulin heterodimers and inhibits microtubule assembly. *Mol Biol Cell* **15**, 2697-706.

**Kim, T. S., Park, J. E., Shukla, A., Choi, S., Murugan, R. N., Lee, J. H., Ahn, M., Rhee, K., Bang, J. K., Kim, B. Y. et al.** (2013). Hierarchical recruitment of Plk4 and regulation of centriole biogenesis by two centrosomal scaffolds, Cep192 and Cep152. *Proc Natl Acad Sci U S A* **110**, E4849-57.

**Kim, T. S., Zhang, L., Il Ahn, J., Meng, L., Chen, Y., Lee, E., Bang, J. K., Lim, J. M., Ghirlando, R., Fan, L. et al.** (2019). Molecular architecture of a cylindrical self-assembly at human centrosomes. *Nat Commun* **10**, 1151.

**Kohlmaier, G., Loncarek, J., Meng, X., McEwen, B. F., Mogensen, M. M., Spektor, A., Dynlacht, B. D., Khodjakov, A. and Gonczy, P.** (2009). Overly long centrioles and defective cell division upon excess of the SAS-4-related protein CPAP. *Curr Biol* **19**, 1012-8.

**Lin, Y. C., Chang, C. W., Hsu, W. B., Tang, C. J., Lin, Y. N., Chou, E. J., Wu, C. T. and Tang, T. K.** (2013a). Human microcephaly protein CEP135 binds to hSAS-6 and CPAP, and is required for centriole assembly. *EMBO J* **32**, 1141-54.

**Lin, Y. N., Wu, C. T., Lin, Y. C., Hsu, W. B., Tang, C. J., Chang, C. W. and Tang, T. K.** (2013b). CEP120 interacts with CPAP and positively regulates centriole elongation. *J Cell Biol* **202**, 211-9.

**Loncarek, J. and Bettencourt-Dias, M.** (2018). Building the right centriole for each cell type. *J Cell Biol* **217**, 823-835.

**Lukinavicius, G., Lavogina, D., Orpinell, M., Umezawa, K., Reymond, L., Garin, N., Gonczy, P. and Johnsson, K.** (2013). Selective chemical crosslinking reveals a Cep57-Cep63-Cep152 centrosomal complex. *Curr Biol* **23**, 265-70.

**Meunier, S., Navarro, M. G., Bossard, C., Laurell, H., Touriol, C., Lacazette, E. and Prats, H.** (2009). Pivotal role of translokine/CEP57 in the unconventional secretion versus nuclear translocation of FGF2. *Traffic* **10**, 1765-72.

**Momotani, K., Khromov, A. S., Miyake, T., Stukenberg, P. T. and Somlyo, A. V.** (2008). Cep57, a multidomain protein with unique microtubule and centrosomal localization domains. *Biochem J* **412**, 265-73.

**Moyer, T. C., Clutario, K. M., Lambrus, B. G., Daggubati, V. and Holland, A. J.** (2015). Binding of STIL to Plk4 activates kinase activity to promote centriole assembly. *J Cell Biol* **209**, 863-78.

**Nigg, E. A. and Holland, A. J.** (2018). Once and only once: mechanisms of centriole duplication and their deregulation in disease. *Nat Rev Mol Cell Biol* **19**, 297-312.

**Nigg, E. A. and Raff, J. W.** (2009). Centrioles, centrosomes, and cilia in health and disease. *Cell* **139**, 663-78.

**Ohta, M., Ashikawa, T., Nozaki, Y., Kozuka-Hata, H., Goto, H., Inagaki, M., Oyama, M. and Kitagawa, D.** (2014). Direct interaction of Plk4 with STIL ensures formation of a single procentriole per parental centriole. *Nat Commun* **5**, 5267.

**Ohta, M., Watanabe, K., Ashikawa, T., Nozaki, Y., Yoshida, S., Kimura, A. and Kitagawa, D.** (2018). Bimodal Binding of STIL to Plk4 Controls Proper Centriole Copy Number. *Cell Rep* **23**, 3160-3169 e4.

**Schmidt, T. I., Kleylein-Sohn, J., Westendorf, J., Le Clech, M., Lavoie, S. B., Stierhof, Y. D. and Nigg, E. A.** (2009). Control of centriole length by CPAP and CP110. *Curr Biol* **19**, 1005-11.

**Sieben, C., Banterle, N., Douglass, K. M., Gonczy, P. and Manley, S.** (2018). Multicolor single-particle reconstruction of protein complexes. *Nat Methods* **15**, 777-780.

**Sir, J. H., Barr, A. R., Nicholas, A. K., Carvalho, O. P., Khurshid, M., Sossick, A., Reichelt, S., D'Santos, C., Woods, C. G. and Gergely, F.** (2011). A primary microcephaly protein complex forms a ring around parental centrioles. *Nat Genet* **43**, 1147-53.

**Snape, K., Hanks, S., Ruark, E., Barros-Nunez, P., Elliott, A., Murray, A., Lane, A. H., Shannon, N., Callier, P., Chitayat, D. et al.** (2011). Mutations in CEP57 cause mosaic variegated aneuploidy syndrome. *Nat Genet* **43**, 527-9.

**Sonnen, K. F., Gabryjonczyk, A. M., Anselm, E., Stierhof, Y. D. and Nigg, E. A.** (2013). Human Cep192 and Cep152 cooperate in Plk4 recruitment and centriole duplication. *J Cell Sci* **126**, 3223-33.

**Tsuchiya, Y., Yoshida, S., Gupta, A., Watanabe, K. and Kitagawa, D.** (2016). Cep295 is a conserved scaffold protein required for generation of a bona fide mother centriole. *Nat Commun* **7**, 12567.

**Wu, Q., He, R., Zhou, H., Yu, A. C., Zhang, B., Teng, J. and Chen, J.** (2012). Cep57, a NEDD1-binding pericentriolar material component, is essential for spindle pole integrity. *Cell Res* **22**, 1390-401.

**Zhao, H., Chen, Q., Fang, C., Huang, Q., Zhou, J., Yan, X. and Zhu, X.** (2019). Parental centrioles are dispensable for deuterosome formation and function during basal body amplification. *EMBO Rep* **20**.

**Zhao, H., Zhu, L., Zhu, Y., Cao, J., Li, S., Huang, Q., Xu, T., Huang, X., Yan, X. and Zhu, X.** (2013). The Cep63 paralogue Deup1 enables massive de novo centriole biogenesis for vertebrate multiciliogenesis. *Nat Cell Biol* **15**, 1434-44.

**Zhou, H., Wang, T., Zheng, T., Teng, J. and Chen, J.** (2016). Cep57 is a Mis12-interacting kinetochore protein involved in kinetochore targeting of Mad1-Mad2. *Nat Commun* **7**, 10151.

## Figure Legends

### **Figure 1. Cep57 co-localizes with Cep63 and Cep152 at the proximal end of centrioles.**

(A) Cep57 co-localized with Cep63 and Cep152. Cep57 (green) was co-stained with Cep63 (red) and Cep152 (blue) in human U2OS cells.

(B) The line intensity plot showed the centriolar colocalization of Cep57, Cep63 and Cep152.

(C, D) Cep63 and Cep152 were recruited to the bundled microtubule by GFP-Cep57 in U2OS cells. U2OS cells transfected with GFP-Cep57 for 48 hours were fixed and stained for Centrin (Cetn, blue) and Cep63 (C, red) or Cep152 (D, red).

(E-G) Cep57 specified MCD cradles during centriole amplification in mTECs. mTECs (E) or mTECs expressing GFP-Cep57 (F) were fixed at day 3 after inducing multiciliation with the air-liquid interfere (ALI d3) and stained for Cep152 (red), Cetn (blue) and Cep57 (green) or GFP. Cep152 serves as the marker of both the mother centriole and deuterosome, and Centrin as the marker of centrioles. Representative 3D-SIM images in the indicated stages of centriole amplification are presented. Magnified areas are used to show details for the MCD (right; arrowheads) and DD (left; arrows) centriole amplification. Schematic illustration models (G) are presented to aid understanding.

### **Figure 2. Cep57 is dispensable for anchoring the Cep63-Cep152 complex although directly interacting with Cep63 .**



(A) Mapping the Cep63-interacting regions of Cep57. The numbers indicate amino acid positions. The N-terminus of Cep57 is required for the interaction with Cep63 and the C-terminus for its centrosomal localization.

(B) Domain mapping of Cep63. The numbers indicate amino acid positions. The N-terminus of Cep63 is required for the interaction with Cep57 and its centrosomal localization, whereas the C-terminus interacts with Cep152 (Zhao et al., 2013).

(C) GST-pull down assay. Bacterial lysates expressing the indicated proteins were mixed and subjected to GST pull-down assays. Cep152M contains the fragment of mouse Cep152 from positions 1075 to 1383 aa (Zhao et al., 2013).

(D) Schematics showing the interaction order of Cep57, Cep63 and Cep152. Cent represents the centrosomal targeting region, and MT stands for the microtubule binding region.

(E,F) The effects of knockout of *Cep63* on the centrosomal localization of Cep152 (E) or Cep57 (F) in U2OS cells. Note that knockout of *Cep63* abolished the centrosomal localization of Cep152, but not Cep57.

(G,H) The effects of knockout of Cep57 on the centrosomal localization of Cep63 (G) or Cep152 (H) in U2OS cells. Note that both Cep63 and Cep152 were still localized to the centrioles upon the *Cep57* depletion.

**Figure 3. Cep5711, the paralog of Cep57, forms a complex with Cep63 and Cep152 at the proximal end of centrioles.**

(A) Schematic diagram of mouse Cep57 and its paralog Cep5711.

(B) Schematic diagram of Cep5711 and deletion mutants showing the ability to interact with Cep63 and to localize to the centriole.

(C) Mapping the Cep63-interacting domain of Cep5711. GFP tagged Cep5711 or mutants were co-expressed with Flag-Cep63 in HEK 293T cells. Co-Immunoprecipitation was then performed with GFP-beads.

(D) Identification of the centrosomal localization regions of Cep5711. The N-terminus of Cep5711 is required and sufficient for the centrosomal localization. U2OS cells were transfected with GFP-tagged Cep5711 or mutants for 48h and the cells were stained for Cetn and Cep152.

(E) Schematic diagram of Cep63 and deletion mutants showing the ability to interact with Cep5711 and Cep152 and to localize to the centriole.

(F) Mapping of the Cep5711-interacting regions of Cep63. GFP tagged Cep5711 was co-expressed with Flag tagged Cep63 or mutants in HEK 293T cells. Co-Immunoprecipitation was then performed with GFP- beads.

(G) Schematics showing the interaction relationship of Cep5711, Cep63 and Cep152. Cent represents the centriolar targeting region.

(H) GFP-Cep5711 co-localized with Cep63 and Cep152 at the proximal end of centrioles in U2OS cells. GFP-Cep5711 was transiently expressed in human U2OS cells and co-stained with Cetn and Cep63 (left) or Cep152 (right).

(I) The subcellular localization of GFP-Cep5711 during centriole amplification in mTECs. Representative 3D-SIM images were acquired from mTECs at ALI d 3. Schematic illustration models are presented to aid understanding.

**Figure 4. Cep57 and Cep5711 recruit the Cep63-Cep152 cradle for centriole duplication.**

(A) Cep5711 knockdown did not affect the centrosomal localization of Cep63 and Cep152. Human U2OS cells were transfected with a control siRNA or two Cep5711 siRNA oligos respectively.

(B) Double depletion of Cep57 and Cep5711 abolished the centrosomal localization of Cep63 and Cep152. *Cep57* knockout cells were transfected with a control siRNA (Ctrl) or two Cep5711 siRNAs (57L1i-1 and 57L1i-2) respectively.

(C) Overexpression of both GFP-tagged Cep57 and RNAi-resistant *hCep5711* fully rescued the centriolar loss of Cep63 upon the co-depletion of Cep57 and Cep5711. For rescue experiments, *Cep57* KO U2OS cells were co-transfected with Cep5711 siRNA oligos together with either GFP-Centn1, GFP-Cep57 or RNAi resistant GFP-*hCep5711* for 48 h and fixed for IF.

(D) Co-depletion of Cep57 and Cep5711 blocked procentriole formation. *Cep57* knockout cells were transfected with control or Cep5711 siRNA oligos and stained for Sas-6 and Centn. EdU was used to label S phase cells.

(E) Percentage of cells with the indicated Sas-6 dots (n=100 cells). The results were from three independent experiments. Two tailed t-test was performed for p-values, error bars represent SD, and asterisks for p-values are \*\* p<0.01 and \*\*\* p<0.001.

## Supplementary Figure Legends

### Figure S1. Domain mapping of Cep57 and Cep63.

(A) The C-terminus of Cep57 was required and sufficient for the centrosomal localization. U2OS cells expressing GFP tagged Cep57 or each fragment were co-stained with Cep152 (red) and Cetn (blue).

(B) Mapping the Cep63-interacting regions of Cep57. GFP-tagged Cep57 or mutants were co-expressed with Flag-Cep63 in HEK 293T cells for 48h and co-Immunoprecipitation was performed with GFP beads. The numbers indicate amino acid positions. The N-terminus of Cep57 was required for the interaction with Cep63 and the C-terminus for its centrosomal localization.

(C) The N-terminus of Cep63 was sufficient for the centrosomal localization. U2OS cells expressing GFP tagged Cep63 or each fragment were co-stained with Cep152 (red) and acetylated Tubulin (blue).

(D) Domain mapping of Cep63. GFP-tagged Cep57 was co-expressed with Flag-Cep63 or mutants in HEK 293T cells for 48h and co-Immunoprecipitation was performed with GFP beads. The numbers indicate amino acid positions. The N-terminus of Cep63 was required for the interaction with Cep57 and its centrosomal localization, whereas the C-terminus was required for interacting with Cep152.

### Figure S2. Sequencing confirmation of *Cep63* or *Cep57* knockout cell lines.

### Figure S3. Sequence alignment of Cep57 and Cep5711.

The proteins sequence alignment was generated with the Clustal X 2.0 software using default parameters. The protein sequences were obtained from GenBank (*hCep57*, NP\_055494; *mCep57*, NP\_080941, *hCep5711*, NP\_001077004 and *mCep5711*, NP\_083408).

**Figure S4. Screening for *hCep5711* siRNA oligos.**

HEK293T cells were co-transfected with GFP-*hCep5711* and the indicated siRNA oligos for 48h and the cells were harvested for immunoblotting.

Figure 1, Zhao et al.

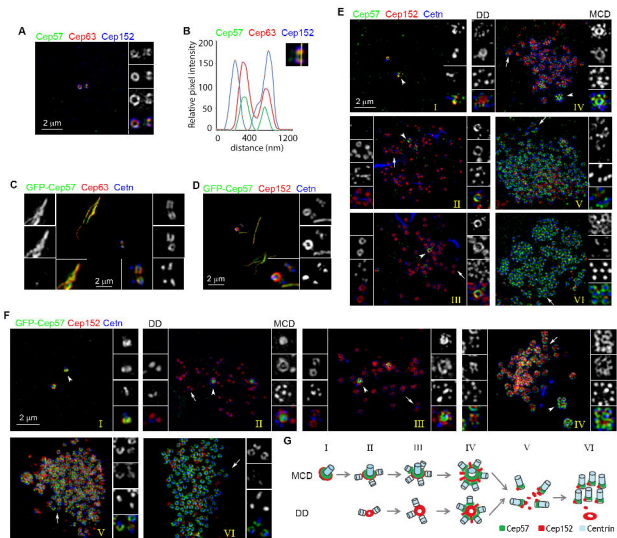

Figure 2, Zhao et al.

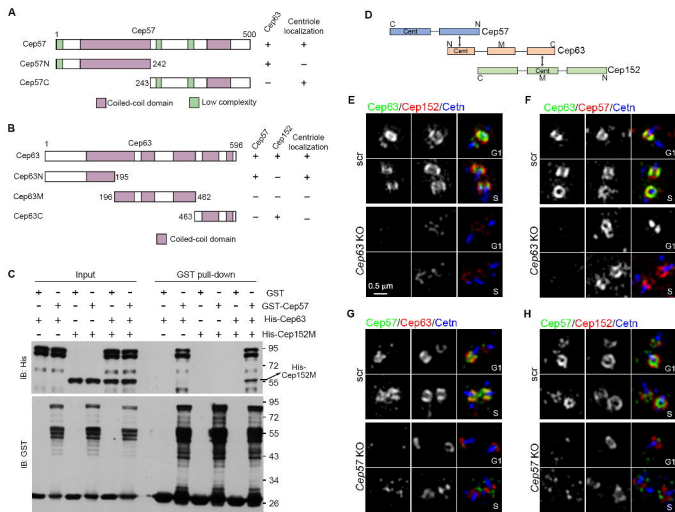

Figure 3, Zhao et al.

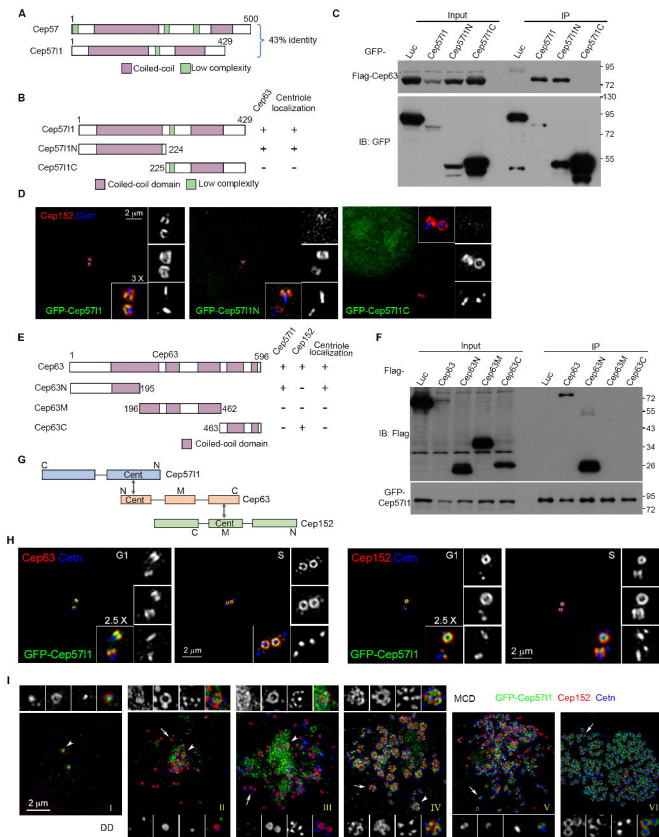



Figure 4, Zhao et al.

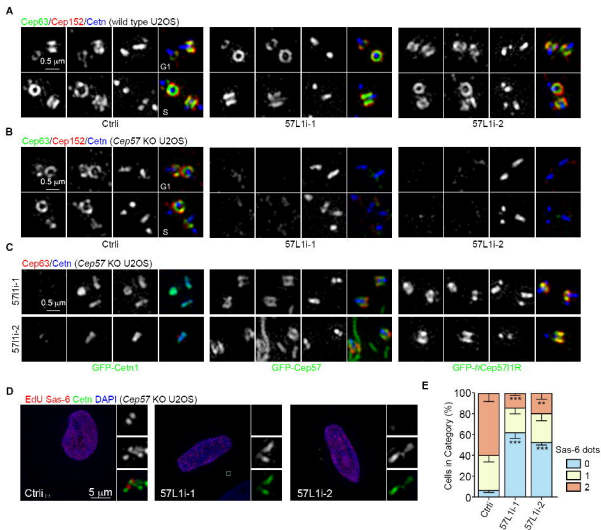

Source: http://biorxiv.org/content/10.1101/842682v1.full.pdf
